# Supplementary material for: Study protocol for randomised clinical trial comparing the effectiveness of side-lying sleep positioning to back-lying at reducing oxygen desaturation resulting from obstructive sleep apnoea in infants with cleft palate (SLUMBRS2)
Source: PubMed Central journal article supplement — BMJ Open. 2021 Apr 6;11(4):e049290. doi: 10.1136/bmjopen-2021-049290 (PMC8031693; doi:10.1136/bmjopen-2021-049290), 2021-04-06
Supplement: bmjopen-2021-049290.reviewer_comments.pdf [file bmjopen-2021-049290.reviewer_comments.pdf]

## PEER REVIEW HISTORY

BMJ Open publishes all reviews undertaken for accepted manuscripts. Reviewers are asked to complete a checklist review form (<http://bmjopen.bmj.com/site/about/resources/checklist.pdf>) and are provided with free text boxes to elaborate on their assessment. These free text comments are reproduced below.

## ARTICLE DETAILS

|                            |                                                                                                                                                                                                                                        |
|----------------------------|----------------------------------------------------------------------------------------------------------------------------------------------------------------------------------------------------------------------------------------|
| <b>TITLE (PROVISIONAL)</b> | Study protocol for randomised clinical trial comparing the effectiveness of side-lying sleep positioning to back-lying at reducing oxygen desaturation resulting from Obstructive Sleep Apnoea in infants with cleft palate (SLUMBR2). |
| <b>AUTHORS</b>             | Metryka, Aleksandra; Cuniffe, Claire; Evans, Hazel J; Gavlak, Johanna G; Hudson, Nichola; Kirby, Nigel; Lakhanpaul, Monica; Lin, Yin-Ling; Murray, Clare; Rajai, Azita; Robson, Helen; Schilder, Anne; Walsh, Tanya; Bruce, Iain       |

This article was not externally reviewed at BMJ Open. Protocols that have been independently assessed prior to submission to BMJ Open are usually fast-tracked to publication on the grounds that further substantial changes will not be possible. This independent assessment will usually be external, independent review for both a substantial grant award from a non-commercial or government funder and ethics approval.
